# Supplementary material for: Conformality limits of 2D WS2 on 3D nanostructures
Source: Royal Society of Chemistry journal article supplement (doi:10.1039/d5nr01013f), 2025-01-01
Supplement: d5nr01013f1.pdf [file d5nr01013f1.pdf]

**Supplemental Information**

**Conformality limits of 2D WS<sub>2</sub> on 3D nanostructures**

Jeff J. P. M. Schulpen<sup>1</sup>, S. Basuvalingam<sup>1</sup>, Marcel A. Verheijen<sup>1,2</sup>, Ageeth A. Bol<sup>1,3</sup>

*<sup>1</sup>Department of Applied Physics and Science Education, Eindhoven University of Technology,  
Eindhoven 5600 MB, the Netherlands*

*<sup>2</sup>Eurofins Materials Science BV, High Tech Campus, Eindhoven 5656 AE, the Netherlands*

*<sup>3</sup>Department of Chemistry, University of Michigan, Ann Arbor, MI 48109, USA*

Classifications of curvature radius and basal plane conformality per corner (maybe = undeterminable). All TEM data that supports this work can be found here:  
<https://doi.org/10.7302/6z5j-fk89>

| fin | corner | type | radius | conformal | fin | corner | type | radius | conformal | fin | corner | type | radius | conformal | fin | corner | type | radius | conformal |
|-----|--------|------|--------|-----------|-----|--------|------|--------|-----------|-----|--------|------|--------|-----------|-----|--------|------|--------|-----------|
| A1  | 0      | top  | 1.81   | maybe     | D1  | 2      | down | 5.06   | yes       | F2  | 5      | down | 2.86   | no        | I1  | 9      | down | 2.00   | maybe     |
| A1  | 1      | down | 2.79   | yes       | D1  | 3      | up   | 2.47   | yes       | F2  | 6      | down | 4.13   | maybe     | I1  | 10     | down | 3.44   | maybe     |
| A1  | 2      | down | 4.17   | yes       | D1  | 4      | up   | 2.79   | yes       | F2  | 7      | up   | 3.33   | maybe     | I1  | 11     | up   | 3.51   | yes       |
| A1  | 3      | up   | 2.70   | yes       | D1  | 5      | down | 2.81   | maybe     | F2  | 8      | up   | 3.50   | maybe     | I1  | 12     | up   | 2.72   | no        |
| A1  | 4      | up   | 2.36   | no        | D1  | 6      | down | 4.04   | yes       | F2  | 9      | down | 3.78   | maybe     | I2  | -1     | top  | 6.90   | maybe     |
| A1  | 5      | down | 1.62   | maybe     | D1  | 7      | up   | 2.72   | yes       | F2  | 10     | down | 2.56   | maybe     | I2  | 0      | top  | 3.73   | no        |
| A1  | 6      | down | 2.72   | maybe     | D1  | 8      | up   | 2.95   | yes       | F2  | 11     | up   | 2.32   | no        | J1  | 0      | top  | 2.27   | no        |
| A1  | 7      | up   | 2.93   | yes       | D1  | 9      | down | 2.32   | maybe     | F2  | 12     | up   | 2.21   | maybe     | J1  | 1      | down | 2.55   | no        |
| A1  | 8      | up   | 1.91   | no        | D1  | 10     | down | 3.51   | maybe     | G1  | 0      | top  | 2.64   | no        | J1  | 2      | down | 3.38   | maybe     |
| A1  | 9      | down | 2.15   | yes       | D1  | 11     | up   | 2.49   | yes       | G1  | 1      | down | 4.04   | yes       | J1  | 3      | up   | 2.96   | maybe     |
| A1  | 10     | down | 3.44   | yes       | D1  | 12     | up   | 2.63   | yes       | G1  | 2      | down | 3.19   | yes       | J1  | 4      | up   | 2.79   | yes       |
| A1  | 11     | up   | 1.85   | maybe     | D2  | -1     | top  | 11.38  | yes       | G1  | 3      | up   | 4.27   | maybe     | J1  | 5      | down | 3.15   | maybe     |
| A1  | 12     | up   | 2.95   | yes       | D2  | 0      | top  | 9.79   | maybe     | G1  | 4      | up   | 2.13   | no        | J1  | 6      | down | 2.87   | maybe     |
| A2  | -1     | top  | 12.72  | yes       | D2  | 1      | down | 2.60   | no        | G1  | 5      | down | 3.23   | maybe     | J1  | 7      | up   | 3.21   | maybe     |
| A2  | 0      | top  | 5.12   | maybe     | D2  | 2      | down | 4.01   | maybe     | G1  | 6      | down | 3.38   | maybe     | J1  | 8      | up   | 3.12   | yes       |
| B1  | 0      | top  | 2.08   | no        | D2  | 3      | up   | 1.85   | no        | G1  | 7      | up   | 3.21   | no        | J1  | 9      | down | 2.23   | yes       |
| B1  | 1      | down | 2.68   | no        | D2  | 4      | up   | 2.82   | no        | G1  | 8      | up   | 4.08   | yes       | J1  | 10     | down | 2.49   | maybe     |
| B1  | 2      | down | 5.04   | maybe     | D2  | 5      | down | 2.46   | maybe     | G1  | 9      | down | 2.81   | maybe     | J1  | 11     | up   | 2.78   | no        |
| B1  | 3      | up   | 1.81   | yes       | D2  | 6      | down | 2.75   | maybe     | G1  | 10     | down | 3.10   | yes       | J1  | 12     | up   | 2.63   | yes       |
| B1  | 4      | up   | 2.53   | maybe     | D2  | 7      | up   | 3.07   | yes       | G1  | 11     | up   | 3.66   | yes       | K1  | 0      | top  | 4.40   | yes       |
| B1  | 5      | down | 1.62   | yes       | D2  | 8      | up   | 2.63   | no        | G1  | 12     | up   | 4.36   | yes       | K1  | 1      | down | 2.64   | no        |
| B1  | 6      | down | 3.59   | maybe     | D2  | 9      | down | 2.25   | maybe     | G2  | -1     | top  | 6.27   | maybe     | K1  | 2      | down | 2.59   | maybe     |
| B1  | 7      | up   | 2.06   | no        | D2  | 10     | down | 3.07   | maybe     | G2  | 0      | top  | 5.05   | maybe     | K1  | 3      | up   | 2.46   | maybe     |
| B1  | 8      | up   | 2.36   | yes       | D2  | 11     | up   | 2.46   | maybe     | G2  | 1      | down | 3.38   | maybe     | K1  | 4      | up   | 2.63   | yes       |
| B1  | 9      | down | 2.06   | maybe     | D2  | 12     | up   | 2.39   | maybe     | G2  | 2      | down | 4.27   | maybe     | K1  | 5      | down | 2.89   | maybe     |
| B1  | 10     | down | 3.51   | yes       | E1  | 0      | top  | 3.57   | yes       | G2  | 3      | up   | 4.06   | yes       | K1  | 6      | down | 3.12   | maybe     |
| B1  | 11     | up   | 2.93   | yes       | E1  | 1      | down | 2.95   | yes       | G2  | 4      | up   | 3.90   | yes       | K1  | 7      | up   | 3.12   | no        |
| B1  | 12     | up   | 2.61   | yes       | E1  | 2      | down | 3.64   | no        | G2  | 5      | down | 3.00   | maybe     | K1  | 8      | up   | 4.08   | yes       |
| B2  | -1     | top  | 12.09  | yes       | E1  | 3      | up   | 2.55   | no        | G2  | 6      | down | 3.66   | maybe     | K1  | 9      | down | 2.04   | maybe     |
| B2  | 0      | top  | 4.72   | maybe     | E1  | 4      | up   | 2.32   | no        | G2  | 7      | up   | 3.66   | no        | K1  | 10     | down | 2.32   | yes       |
| B2  | 1      | down | 5.59   | maybe     | E1  | 5      | down | 3.06   | maybe     | G2  | 8      | up   | 3.19   | no        | K1  | 11     | up   | 3.21   | no        |
| B2  | 2      | down | 5.89   | maybe     | E1  | 6      | down | 3.17   | maybe     | G2  | 9      | down | 2.63   | maybe     | K1  | 12     | up   | 2.42   | no        |
| B2  | 3      | up   | 5.77   | yes       | E1  | 7      | up   | 2.72   | no        | G2  | 10     | down | 3.10   | maybe     | L1  | 0      | top  | 3.76   | yes       |
| B2  | 4      | up   | 5.09   | maybe     | E1  | 8      | up   | 2.57   | no        | G2  | 11     | up   | 3.64   | no        | L1  | 1      | down | 2.76   | maybe     |
| B2  | 5      | up   | 4.44   | maybe     | E1  | 9      | down | 3.27   | yes       | G2  | 12     | up   | 4.69   | yes       | L1  | 2      | down | 4.66   | yes       |
| B2  | 6      | down | 4.04   | maybe     | E1  | 10     | down | 3.76   | maybe     | H1  | 0      | top  | 4.53   | yes       | L1  | 3      | up   | 2.30   | yes       |
| B2  | 7      | up   | 4.06   | yes       | E1  | 11     | up   | 2.66   | no        | H1  | 1      | down | 2.91   | maybe     | L1  | 4      | up   | 2.25   | no        |
| B2  | 8      | up   | 4.76   | no        | E1  | 12     | up   | 2.64   | yes       | H1  | 2      | down | 2.32   | no        | L1  | 5      | down | 2.85   | maybe     |
| B2  | 9      | down | 3.75   | maybe     | E2  | -1     | top  | 3.52   | no        | H1  | 3      | up   | 3.76   | yes       | L1  | 6      | down | 3.83   | maybe     |
| B2  | 10     | down | 4.65   | maybe     | E2  | 0      | top  | 8.10   | yes       | H1  | 4      | up   | 3.49   | no        | L1  | 7      | up   | 2.23   | maybe     |
| B2  | 11     | up   | 5.14   | yes       | E2  | 1      | down | 3.05   | maybe     | H1  | 5      | down | 3.74   | yes       | L1  | 8      | up   | 2.49   | no        |
| B2  | 12     | up   | 2.93   | no        | E2  | 2      | down | 4.01   | maybe     | H1  | 6      | down | 2.81   | maybe     | L1  | 9      | down | 2.15   | yes       |
| C1  | 0      | top  | 2.93   | yes       | E2  | 3      | up   | 3.99   | maybe     | H1  | 7      | up   | 2.89   | no        | L1  | 10     | down | 2.79   | maybe     |
| C1  | 1      | down | 3.10   | yes       | E2  | 4      | up   | 3.85   | yes       | H1  | 8      | up   | 2.98   | yes       | L1  | 11     | up   | 2.12   | no        |
| C1  | 2      | down | 4.85   | yes       | E2  | 5      | down | 2.32   | maybe     | H1  | 9      | down | 3.06   | no        | L1  | 12     | up   | 2.98   | no        |
| C1  | 3      | up   | 2.61   | yes       | E2  | 6      | down | 3.21   | maybe     | H1  | 10     | down | 3.19   | no        | M1  | 0      | top  | 4.15   | yes       |
| C1  | 4      | up   | 2.36   | no        | E2  | 7      | up   | 2.44   | yes       | H1  | 11     | up   | 2.70   | yes       | M1  | 1      | down | 2.55   | yes       |
| C1  | 5      | down | 2.08   | maybe     | E2  | 8      | up   | 3.10   | no        | H1  | 12     | up   | 2.91   | maybe     | M1  | 2      | down | 3.27   | maybe     |
| C1  | 6      | down | 3.91   | yes       | E2  | 9      | down | 2.93   | maybe     | H2  | -1     | top  | 7.06   | yes       | M1  | 3      | up   | 1.81   | no        |
| C1  | 7      | up   | 2.51   | yes       | E2  | 10     | down | 3.36   | yes       | H2  | 0      | top  | 5.94   | maybe     | M1  | 4      | up   | 3.06   | no        |
| C1  | 8      | up   | 2.85   | yes       | E2  | 11     | up   | 1.81   | no        | H2  | 1      | down | 4.41   | maybe     | M1  | 5      | down | 2.89   | maybe     |
| C1  | 9      | down | 2.63   | no        | E2  | 12     | up   | 2.18   | no        | H2  | 2      | down | 4.22   | maybe     | M1  | 6      | down | 2.53   | maybe     |
| C1  | 10     | down | 2.55   | maybe     | F1  | 0      | top  | 2.66   | maybe     | H2  | 3      | up   | 3.03   | no        | M1  | 7      | up   | 3.74   | maybe     |
| C1  | 11     | up   | 2.51   | yes       | F1  | 1      | down | 3.78   | no        | H2  | 4      | up   | 5.42   | yes       | M1  | 8      | up   | 2.38   | maybe     |
| C1  | 12     | up   | 2.44   | no        | F1  | 2      | down | 3.78   | maybe     | H2  | 5      | down | 4.32   | maybe     | M1  | 9      | down | 2.34   | no        |
| C2  | -1     | top  | 11.01  | yes       | F1  | 3      | up   | 3.57   | maybe     | H2  | 6      | down | 4.69   | maybe     | M1  | 10     | down | 3.27   | maybe     |
| C2  | 0      | top  | 8.59   | yes       | F1  | 4      | up   | 5.59   | yes       | H2  | 7      | up   | 3.54   | no        | M1  | 11     | up   | 2.81   | yes       |
| C2  | 1      | down | 3.68   | maybe     | F1  | 5      | down | 3.30   | maybe     | H2  | 8      | up   | 3.68   | maybe     | M1  | 12     | up   | 2.63   | no        |
| C2  | 2      | down | 5.07   | maybe     | F1  | 6      | down | 4.40   | yes       | H2  | 9      | down | 3.38   | maybe     | N1  | 0      | top  | 3.06   | yes       |
| C2  | 3      | up   | 3.87   | yes       | F1  | 7      | up   | 4.82   | maybe     | H2  | 10     | down | 3.87   | no        | N1  | 1      | down | 2.76   | maybe     |
| C2  | 4      | up   | 4.95   | maybe     | F1  | 8      | up   | 2.70   | yes       | H2  | 11     | up   | 3.71   | maybe     | N1  | 2      | down | 2.89   | maybe     |
| C2  | 5      | down | 3.36   | no        | F1  | 9      | down | 2.61   | maybe     | H2  | 12     | up   | 5.61   | maybe     | N1  | 3      | up   | 2.32   | maybe     |
| C2  | 6      | down | 4.36   | maybe     | F1  | 10     | down | 3.34   | maybe     | I1  | 0      | top  | 4.87   | yes       | N1  | 4      | up   | 2.06   | no        |
| C2  | 7      | up   | 4.39   | yes       | F1  | 11     | up   | 4.59   | yes       | I1  | 1      | down | 2.49   | maybe     | N1  | 5      | down | 2.21   | maybe     |
| C2  | 8      | up   | 4.15   | maybe     | F1  | 12     | up   | 3.21   | no        | I1  | 2      | down | 5.78   | yes       | N1  | 6      | down | 2.98   | maybe     |
| C2  | 9      | down | 4.18   | maybe     | F2  | -1     | top  | 4.08   | no        | I1  | 3      | up   | 3.42   | yes       | N1  | 7      | up   | 2.55   | maybe     |
| C2  | 10     | down | 4.18   | maybe     | F2  | 0      | top  | 10.82  | yes       | I1  | 4      | up   | 2.57   | maybe     | N1  | 8      | up   | 5.02   | yes       |
| C2  | 11     | up   | 4.15   | maybe     | F2  | 1      | down | 3.78   | maybe     | I1  | 5      | down | 1.96   | maybe     | N1  | 9      | down | 2.38   | maybe     |
| C2  | 12     | up   | 2.09   | no        | F2  | 2      | down | 3.52   | maybe     | I1  | 6      | down | 2.93   | yes       | N1  | 10     | down | 2.96   | maybe     |
| D1  | 0      | top  | 2.91   | yes       | F2  | 3      | up   | 2.60   | yes       | I1  | 7      | up   | 2.36   | no        | N1  | 11     | up   | 3.13   | maybe     |
| D1  | 1      | down | 3.15   | no        | F2  | 4      | up   | 3.21   | maybe     | I1  | 8      | up   | 2.23   | yes       | N1  | 12     | up   | 2.70   | no        |

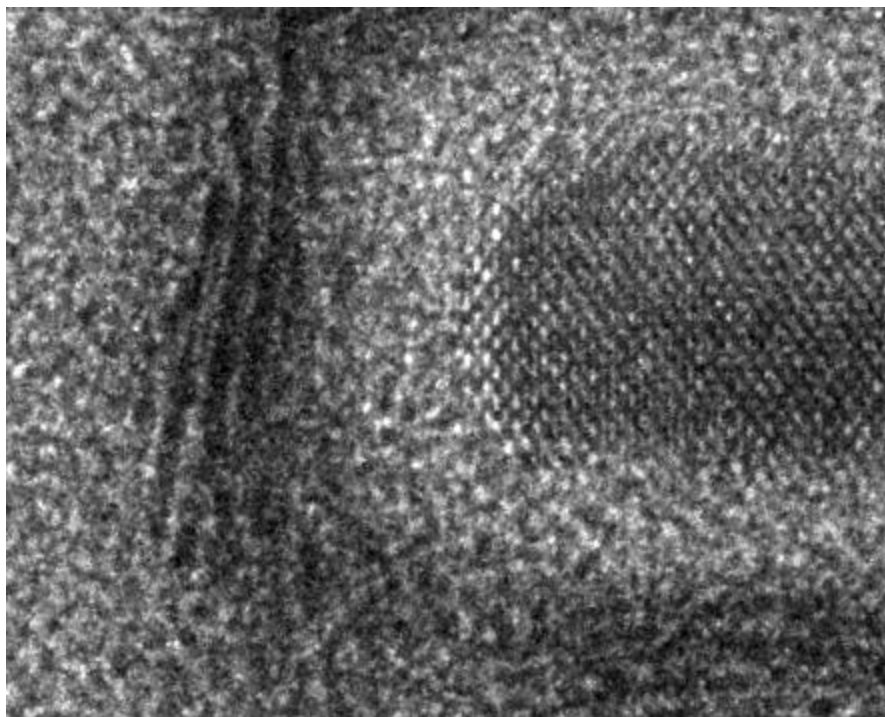

Figure: TEM image of an edge that was classified ‘undeterminable’.
